# Supplementary material for: Type X strains of Toxoplasma gondii are virulent for southern sea otters (Enhydra lutris nereis) and present in felids from nearby watersheds
Source: Proc Biol Sci. 2019 Aug 21;286(1909):20191334. doi: 10.1098/rspb.2019.1334 (PMC6732395; doi:10.1098/rspb.2019.1334)
Supplement: Supplementary data 2 [file rspb20191334supp3.xlsx]

## Sheet: SupData2_ALLgenotypeData
STATA_SO_order	BATCH	Project SO#	SO_ID#	Isolate_ID	B1_MLST	L358_MLST	PK1_MLST	SAG1_MLST	BTUB_MLST	GRA6_MLST	MLST_code	MLST description	RFLP_code	ToxoDB_type	ageclass	sex	date_yr	date_wateryear	loci_num
1	BATCH 1	23	2787-02	TgSoUS2787	II/III	II	II	II/III	II	II	0	Type II	0	1	Adult	Female	2002	2002	6
2	Batch 10	1	2987-98	TgSoUS2987	faint band	II	II	NA	II	NA	0	Type II	0	1	Subadult	Female	1998	1998	3
3	Batch 10	3	3005-98	TgSoUS3005	II/III	II	faint band	NA	II	NA	0	Type II	0	1	Adult	Male	1998	1998	3
4	Batch 10	5	3026-98	TgSoUS3026	X	I/X	X	X	X	X	6	Type X	1	5	Aged Adult	Male	1998	1998	6
5	Batch 10	6	3045-98	TgSoUS3045	X	I/X	X	X	X	X	6	Type X	1	5	Adult	Female	1998	1998	6
6	Batch 10	7	3077-98	TgSoUS3077	X	I/X	X	X	X	X	6	Type X	1	5	Adult	Male	1998	1998	6
7	Batch 10	8	3087-98	TgSoUS3087	II/III	II	II	II/III	II	II	0	Type II	0	1	Adult	Female	1998	1999	6
8	Batch 10	9	3097-98	TgSoUS3097	Xvar	I/X	X	X	X	X	7	Type X variant	1	5	Adult	Male	1998	1999	6
9	Batch 10	11	3131-99	TgSoUS3131	II/III	II	II_varB	II/III	II	II	2	Type II variant B	0	1	Aged Adult	Male	1999	1999	6
10	Batch 10	12	3160-99	TgSoUS3160	X	I/X	X	X	X	NA	6	Type X	1	5	Adult	Male	1999	1999	5
12	Batch 5	41	3178-99-02	TgSoUS3178	X	I/X	II var	X	X	X	9	Type X/II variant C	1	5	Subadult	Female	2002	2002	6
13	Batch 9	15	3182-99	TgSoUS3182	II/III	II	II	II/III	II	II	0	Type II	0	1	Adult	Male	1999	1999	6
14	Batch 10	16	3183-99	TgSoUS3183	X	I/X	IIvar	X	X	X	9	Type X/II variant C	1	5	Aged Adult	Female	1999	1999	6
15	Batch 10	17	3208-99	TgSoUS3208	II/III	II	II	II/III	II	II	0	Type II	0	1	Adult	Male	1999	1999	6
16	Batch 10	18	3234-99	TgSoUS3234	X	I/X	faint band	X	faint band	X	6	Type X	1	5	Adult	Male	1999	1999	4
17	Batch 10	19	3265-99	TgSoUS3265	Xvar	I/X	X	X	X	X	7	Type X variant	1	5	Adult	Female	1999	1999	6
18	Batch 10	21	3287-99	TgSoUS3287	faint band	I/X	IIvar	X	X	X	9	Type X/II variant C	1	5	Adult	Female	1999	2000	5
19	Batch 10	22	3298-99	TgSoUS3298	Xvar	I/X	X	X	X	X	7	Type X variant	1	5	Adult	Female	1999	2000	6
20	Batch 10	23	3387-00	TgSoUS3387	Xvar	I/X	NA	X	X	X	7	Type X variant	1	5	Subadult	Female	2000	2000	5
21	BATCH 1	6	3396-00	TgSoUS3396	II/III	II	II	II/III	II	II	0	Type II	0	1	Subadult	Male	2000	2000	6
22	BATCH 1	5	3429-00	TgSoUS3429	X	I/X	X	X	X	X	6	Type X	1	5	Immature	Female	2000	2001	6
23	BATCH 1	7	3451-00	TgSoUS3451	X	I/X	NA	X	X	X	6	Type X	1	5	Subadult	Male	2000	2001	5
24	BATCH 1	12	3458-01	TgSoUS3458	X	I/X	II var	X	X	X	9	Type X/II variant C	1	5	Adult	Female	2001	2001	6
25	BATCH 1	9	3483-01	TgSoUS3483	X	I/X	II var	X	X	X	9	Type X/II variant C	1	5	Adult	Female	2001	2001	6
26	BATCH 1	8	3488-01	TgSoUS3488	X	I/X	X	X	X	X	6	Type X	1	5	Aged Adult	Female	2001	2001	6
27	BATCH 1	13	3503-01	TgSoUS3503	X	I/X	X	X	X	X	6	Type X	1	5	Subadult	Male	2001	2001	6
28	BATCH 1	10	3508-01	TgSoUS3508	Xvar	I/X	X	X	X	X	7	Type X variant	1	5	Adult	Male	2001	2001	6
29	BATCH 1	11	3521-01	TgSoUS3521	II/III	II	II	II/III	II	II	0	Type II	0	1	Adult	Male	2001	2001	6
30	BATCH 1	17	3523-01	TgSoUS3523	X	NA	NA	NA	NA	NA	6	Type X	1	5	Subadult	Female	2001	2001	1
31	BATCH 1	14	3576-01	TgSoUS3576	II/III	II	II	II/III	II	II	0	Type II	0	1	Subadult	Male	2001	2001	6
32	BATCH 1	15	3587-01**	TgSoUS3587	X	II	II	II/III	II	II	3	II/X A	2	1	Adult	Male	2001	2001	6
33	BATCH 1	18	3636-01	TgSoUS3636	II/III	II	II	II/III	II	II	0	Type II	0	1	Adult	Male	2001	2002	6
34	Batch 8	51	3637-01	TgSoUS3637	Xvar	X	X	X	X	X	7	Type X variant	1	5	Adult	Female	2002	2003	6
35	BATCH 1	22	3639-02	TgSoUS3639	Xvar	NA	NA	NA	NA	NA	7	Type X variant	1	5	Immature	Male	2001	2003	1
36	BATCH 1	19	3659-02	TgSoUS3659	Xvar	I/X	X	X	X	X	7	Type X variant	1	5	Adult	Female	2002	2002	6
38	BATCH 1	20	3675-02	TgSoUS3675	poor	II	II	NA	II	II	0	Type II	0	1	Adult	Female	2002	2002	1
39	BATCH 1	24	3728-02	TgSoUS3728	X	I/X	II var	X	X	X	6	Type X	1	5	Aged Adult	Male	2002	2002	6
40	BATCH 1	25	3739-02	TgSoUS3739	X	NA	NA	NA	NA	NA	6	Type X	1	5	Adult	Male	2002	2002	1
41	BATCH 1	26	3744-02	TgSoUS3744	Xvar	I/X	X	X	X	X	7	Type X variant	1	5	Adult	Female	2002	2002	6
42	BATCH 1	27	3786-02	TgSoUS3786	X	I/X	II var	X	X	X	9	Type X/II variant C	1	5	Adult	Male	2002	2002	6
43	BATCH 1	29	3814-02	TgSoUS3814	Xvar	I/X	X	X	X	X	7	Type X variant	1	5	Adult	Female	2002	2003	6
44	BATCH 1	30	3819-02	TgSoUS3819	X	I/X	X	X	X	X	6	Type X	1	5	Adult	Female	2002	2003	6
45	BATCH 1	28	3821-03	TgSoUS3821	X	I/X	X	X	X	X	6	Type X	1	5	Adult	Male	2003	2003	6
46	Batch 2	31	3825-03	TgSoUS3825	X	I/X	II var	X	X	X	9	Type X/II variant C	1	5	Adult	Male	2003	2003	6
47	Batch 2	32	3849-03	TgSoUS3849	II/III	II	NA	II/III	II	II	0	Type II	0	1	Pup	Male	2003	2003	5
48	Batch 2	33	3865-03	TgSoUS3865	Xvar	I/X	X	X	X	X	7	Type X variant	1	5	Adult	Female	2003	2003	6
49	Batch 2	37	3874-03	TgSoUS3874	X	I/X	X	X	X	X	6	Type X	1	5	Adult	Male	2003	2003	6
50	Batch 2	34	3882-03	TgSoUS3882	Xvar	I/X	X	X	X	X	7	Type X variant	1	5	Adult	Male	2003	2003	6
51	Batch 2	35	3897-03	TgSoUS3897	X	I/X	II var	X	X	X	9	Type X/II variant C	1	5	Adult	Female	2003	2003	6
52	Batch 2	38	3901-03	TgSoUS3901	X	I/X	II var	X	X	X	9	Type X/II variant C	1	5	Adult	Female	2003	2003	6
53	Batch 2	36	3907-03	TgSoUS3907	Xvar	I/X	X	X	X	X	7	Type X variant	1	5	Aged Adult	Male	2003	2003	6
54	Batch 2	39	3936-03	TgSoUS3936	X	I/X	II var	X	X	X	9	Type X/II variant C	1	5	Adult	Male	2003	2003	6
55	Batch 2	40	3947-03	TgSoUS3947	X	I/X	X	X	X	X	6	Type X	1	5	Adult	Female	2003	2003	6
56	Batch 2	41	3950-03**	TgSoUS3950	X	II	II	II/III	II	II	3	II/X A	2	1	Aged Adult	Male	2003	2003	6
57	Batch 2	42	3991-03	TgSoUS3991	II/III	II	II	II/III	II	II	0	Type II	0	1	Aged Adult	Male	2003	2003	6
58	Batch 2	43	3992-03	TgSoUS3992	X	I/X	X	X	X	X	6	Type X	1	5	Adult	Male	2003	2003	6
59	Batch 2	44	4001-03	TgSoUS4001	II/III	II	II	X	II	II	5	II/X C	2	Unique	Aged Adult	Male	2003	2003	6
60	Batch 2	45	4003-03	TgSoUS4003	Xvar	I/X	X	X	X	X	7	Type X variant	1	5	Adult	Female	2003	2003	6
61	Batch 2	48	4010-03	TgSoUS4010	II/III	II	II	II/III	II	II	0	Type II	0	1	Aged Adult	Female	2003	2003	6
62	Batch 2	46	4028-03	TgSoUS4028	X	I/X	X	X	X	NA	6	Type X	1	5	Adult	Female	2003	2004	5
63	Batch 2	47	4045-03	TgSoUS4045	Xvar	I/X	II var	X	X	X	10	Type X variant / II variant C	1	5	Adult	Male	2003	2004	6
64	Batch 2	49	4071-03	TgSoUS4071	X	I/X	NA	X	X	X	6	Type X	1	5	Adult	Female	2003	2004	5
65	Batch 2	51	4139-04	TgSoUS4139	faint band	I/X	II var	X	X	X	9	Type X/II variant C	1	5	Adult	Female	2004	2004	5
66	Batch 5	71	4140-04	TgSoUS4140	II/III	II	II	II/III	II	II	0	Type II	0	1	Adult	Female	2004	2004	6
67	Batch 5	73	4151-04	TgSoUS4151	Xvar	I/X	X	X	X	X	7	Type X variant	1	5	Subadult	Female	2004	2004	6
68	Batch 5	72	4152-04	TgSoUS4152	II/III	II	II	II/III	II	II	0	Type II	0	1	Aged Adult	Male	2004	2004	6
69	Batch 5	76	4166-04	TgSoUS4166	X	I/X	poor	X	II	X	8	Type X/II	1	5	Subadult	Male	2004	2004	5
70	Batch 5	74	4167-04	TgSoUS4167	X	I/X	X	X	X	X	6	Type X	1	5	Adult	Male	2004	2004	6
71	Batch 2	50	4169-04	TgSoUS4169	Xvar	I/X	X	X	X	X	7	Type X variant	1	5	Subadult	Male	2004	2004	6
72	Batch 5	77	4178-04	TgSoUS4178	Xvar	I/X	X	X	X	X	7	Type X variant	1	5	Adult	Male	2004	2004	6
73	Batch 5	79	4183-04	TgSoUS4183	X	I/X	X	X	X	X	6	Type X	1	5	Adult	Male	2004	2004	6
74	Batch 5	80	4189-04	TgSoUS4189	Xvar	I/X	X	X	X	X	7	Type X variant	1	5	Subadult	Female	2004	2004	6
75	Batch 9	81	4287-04	TgSoUS4287	X	I/X	IIvar	X	X	NA	9	Type X/II variant C	1	5	Aged Adult	Female	2004	2004	5
76	Batch 8	84	4294-04	TgSoUS4294	II/III	NA	NA	II/III	II	II	0	Type II	0	1	Adult	Female	2004	2004	4
77	Batch 9	82	4295-04	TgSoUS4295	X	I/X	X	X	X	NA	6	Type X	1	5	Adult	Male	2004	2004	5
78	Batch 9	83	4311-04	TgSoUS4311	X	I/X	X	X	X	NA	6	Type X	1	5	Adult	Female	2004	2004	5
79	Batch 8	85	4318-04	TgSoUS4318	X	X	poor	X	X	X	6	Type X	1	5	Adult	Male	2004	2004	5
80	Batch 9	86	4322-04	TgSoUS4322	X	I/X	IIvar	X	X	X	9	Type X/II variant C	1	5	Aged Adult	Male	2004	2004	6
81	Batch 9	87	4361-04	TgSoUS4361	X	I/X	IIvar	X	X	X	9	Type X/II variant C	1	5	Aged Adult	Female	2004	2005	6
82	Batch 8	88	4379-05	TgSoUS4379	X	X	X	X	X	X	6	Type X	1	5	Adult	Male	2005	2005	6
83	Batch 8	89	4388-05	TgSoUS4388	II/III	II	poor	II/III	II		0	Type II	0	1	Adult	Male	2005	2005	5
84	Batch 8	90	4390-05	TgSoUS4390	X	X	X	X	X	X	6	Type X	1	5	Subadult	Male	2005	2005	6
85	Batch 6	91	4408-05	TgSoUS4408	X	I/X	II var	X	X	X	9	Type X/II variant C	1	5	Adult	Female	2005	2005	6
86	Batch 6	92	4429-05	TgSoUS4429	Xvar	I/X	X	X	X	X	7	Type X variant	1	5	Adult	Male	2005	2005	6
87	Batch 9	93	4430-05	TgSoUS4430	II/III	II	NA	II/III	II	II	0	Type II	0	1	Adult	Female	2005	2005	5
88	Batch 8	94	4436-05	TgSoUS4436	X	X	failed	NA	X	poor	6	Type X	1	5	Subadult	Male	2005	2005	2
89	Batch 9	96	4449-05	TgSoUS4449	Xvar	I/X	NA	X	NA	NA	7	Type X variant	1	5	Subadult	Female	2005	2005	3
90	Batch 9	95	4451-05	TgSoUS4451	X	I/X	X	X	X	X	6	Type X	1	5	Subadult	Male	2005	2005	6
91	Batch 9	97	4457-05	TgSoUS4457	Xvar	I/X	X	X	X	X	7	Type X variant	1	5	Adult	Male	2005	2005	6
92	Batch 7	98	4469-05	TgSoUS4469	X	I/X	X	X	X	X	6	Type X	1	5	Aged Adult	Female	2005	2005	6
93	Batch 7	99	4473-05	TgSoUS4473	II/III	failed	failed	no band	II	II	0	Type II	0	1	Aged Adult	Male	2005	2005	3
94	Batch 9	100	4474-05	TgSoUS4474	II/III	II	NA	II/III	NA	NA	0	Type II	0	1	Pup	Female	2005	2005	3
95	Batch 6	101	4587-05	TgSoUS4587	X	I/X	X	X	X	X	6	Type X	1	5	Subadult	Female	2005	2005	6
96	Batch 7	102	4628-05	TgSoUS4628	X	I/X	X	X	X	X	6	Type X	1	5	Adult	Male	2005	2006	6
97	Batch 6	103	4630-05	TgSoUS4630	X	I/X	X	X	X	X	6	Type X	1	5	Adult	Male	2005	2006	6
98	Batch 8	104	4633-05	TgSoUS4633	X	X	NA	poor	X	X	6	Type X	1	5	Adult	Female	2005	2006	3
99	Batch 7	105	4649-06	TgSoUS4649	II/III	II	NA	II/III var	II	II	1	Type II variant A	0	1	Adult	Male	2006	2006	5
100	Batch 6	106	4660-06	TgSoUS4660	Xvar	I/X	X	X	X	X	7	Type X variant	1	5	Adult	Male	2006	2006	6
101	Batch 6	107	4673-06	TgSoUS4673	X	I/X	X	X	X	X	6	Type X	1	5	Subadult	Female	2006	2006	6
102	Batch 6	108	4678-06	TgSoUS4678-	X	I/X	X	X	X	X	6	Type X	1	5	Adult	Female	2006	2006	6
103	Batch 6	109	4705-06	TgSoUS4705	X	I/X	II var	X	X	X	9	Type X/II variant C	1	5	Adult	Female	2006	2006	6
105	Batch 7	111	4724-06	TgSoUS4724	Xvar	X	poor	X	X	X	7	Type X variant	1	5	Subadult	Female	2006	2006	5
107	Batch 7	113	4732-06	TgSoUS4732	II	II	poor	II/III	II	II	0	Type II	0	1	Adult	Male	2006	2006	5
108	Batch 6	114	4742-06	TgSoUS4742	Xvar	I/X	X var	X	X	X	6	Type X	1	5	Adult	Male	2006	2006	6
109	Batch 7	115	4748-06	TgSoUS4748	X	I/X	II var	X	X	X	9	Type X/II variant C	1	5	Adult	Female	2006	2006	6
110	Batch 7	116	4751-06	TgSoUS4751	X	I/X	X	NA	X	X	7	Type X variant	1	5	Adult	Male	2006	2006	5
111	Batch 7	118	4772-06	TgSoUS4772	II/III	II	poor	II/III	poor	II	0	Type II	0	1	Adult	Female	2006	2006	4
112	Batch 7	119	4782-06	TgSoUS4782	NA	II	poor	II/III	poor	II	0	Type II	0	1	Pup	Female	2006	2006	3
113	Batch 7	122	4791-06	TgSoUS4791	Xvar	I/X	II var	X	X	X	7	Type X variant	1	5	Aged Adult	Male	2006	2006	6
114	Batch 7	121	4794-06	TgSoUS4794	Xvar	I/X	X	X	X	X	7	Type X variant	1	5	Subadult	Male	2006	2006	6
115	Batch 7	120	4795-06	TgSoUS4795	II/III	II	II var	II/III	II	II	0	Type II	0	1	Adult	Female	2006	2006	6
116	Batch 5	123	4818-06	TgSoUS4818	II/III	I/X	II	II/III	II	II	4	II/X B	2	4	Adult	Female	2006	2006	6
117	Batch 6	124	4831-06	TgSoUS4831	Xvar	I/X	X	X	X	X	7	Type X variant	1	5	Subadult	Male	2006	2006	6
118	Batch 5	125	4834-06	TgSoUS4834	Xvar	I/X	X	X	X	X	7	Type X variant	1	5	Adult	Male	2006	2006	6
119	Batch 6	126	4842-06	TgSoUS4842	X	I/X	II var - R only	X	X	X	9	Type X/II variant C	1	5	Adult	Male	2006	2006	6
120	Batch 6	128	4851-06	TgSoUS4851	Xvar	I/X	II var	X	X	X	10	Type X variant / II variant C	1	5	Subadult	Male	2006	2007	6
121	Batch 5	127	4852-06	TgSoUS4852	NA	I/X	poor	X	X	X	6	Type X	1	5	Subadult	Female	2006	2007	4
122	Batch 6	129	4870-06	TgSoUS4870	X	I/X	II var	X	X	X	9	Type X/II variant C	1	5	Adult	Male	2006	2007	6
123	Batch 5	130	4899-06	TgSoUS4899	X	I/X	poor	X	X	X	6	Type X	1	5	Adult	Male	2006	2007	5
124	Batch 5	131	4923-07	TgSoUS4923	X	I/X	poor	X	X	X	6	Type X	1	5	Aged Adult	Male	2007	2007	5
125	Batch 5	132	4924-07	TgSoUS4924	Xvar	I/X	failed	X	X	X	7	Type X variant	1	5	Adult	Male	2007	2007	5
126	Batch 6	133	4932-07	TgSoUS4932	Xvar	I/X	II var	X	X	X	10	Type X variant / II variant C	1	5	Adult	Male	2007	2007	6
127	Batch 6	134	4946-07	TgSoUS4946	X	I/X	II var	X	X	X	9	Type X/II variant C	1	5	Subadult	Male	2007	2007	6
128	Batch 5	135	4971-07	TgSoUS4971	X	I/X	failed	X	X	X	6	Type X	1	5	Adult	Male	2007	2007	5
129	Batch 7	136	4983-07	TgSoUS4983	Xvar	I/X	II var	X	X	X	10	Type X variant / II variant C	1	5	Adult	Female	2007	2007	6
130	Batch 7	137	4995-07	TgSoUS4995	poor	I/X	X	X	X	X	6	Type X	1	5	Subadult	Female	2007	2007	5
131	Batch 7	138	5001-07	TgSoUS5001	Xvar	I/X	poor	X	NA	X	7	Type X variant	1	5	Adult	Male	2007	2007	4
132	Batch 9	139	5006-07	TgSoUS5006	X	I/X	IIvar	X	X	X	6	Type X	1	5	Adult	Female	2007	2007	6
133	Batch 9	141	5256-08	TgSoUS5256	X	I/X	II	X	X	X	6	Type X	1	5	Subadult	Female	2008	2008	6
134	Batch 9	140	5263-08	TgSoUS5263	X	I/X	X	X	X	X	6	Type X	1	5	Subadult	Female	2008	2008	6
136	Batch 9	143	5278-08	TgSoUS5278	II/III	II	II	II/III	II	II	0	Type II	0	1	Adult	Female	2008	2008	6
137	Pilot set	1	5392-08	TgSoUS5392	X	I/X	II var	poor	poor	X	9	Type X/II variant C	1	5	Adult	Female	2008	2008	4
138	Pilot set	4	5417-08	TgSoUS5417	Xvar	I/X	X	X	poor	X	7	Type X variant	1	5	Adult	Female	2008	2009	5
139	Pilot set	2	5418-08	TgSoUS5418	X	I/X	II var	X	poor	X	9	Type X/II variant C	1	5	Adult	Male	2008	2009	5
140	Pilot set	3	7430-15	TgSoUS7430	X	I/X	X	X	poor	X	6	Type X	1	5	Adult	Female	2015	2015	5
